# Supplementary material for: Comparative analyses of two Geraniaceae transcriptomes using next-generation sequencing
Source: PubMed Central journal article supplement (PMC3880972; doi:10.1186/1471-2229-13-228), 2013-12-29

**A**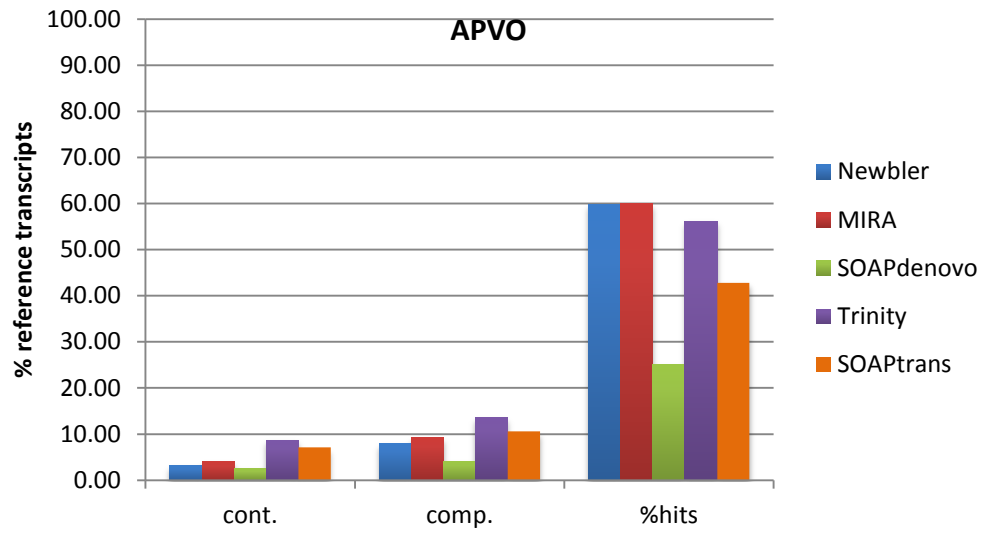**B**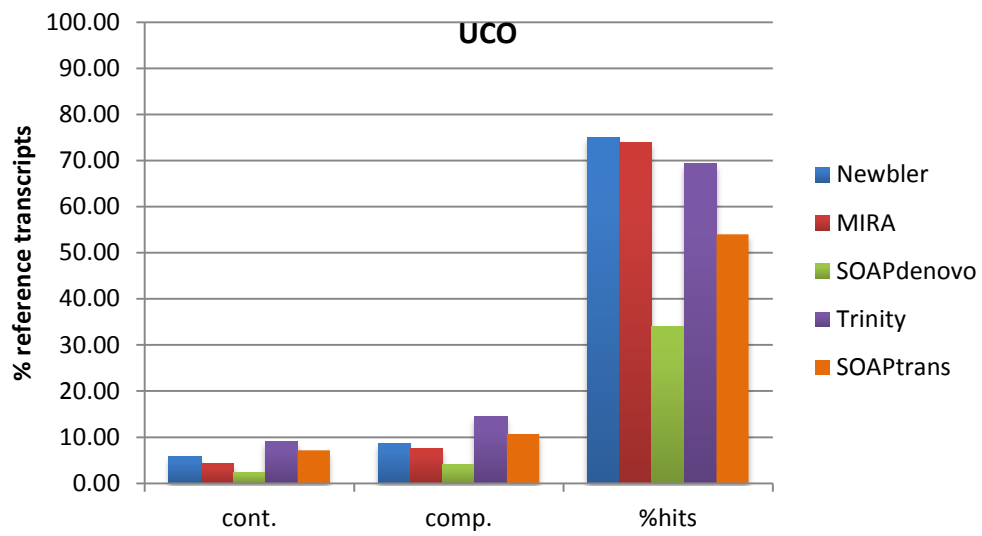

Supplement: 1471-2229-13-228-S1.pdf [file 1471-2229-13-228-S1.pdf]
